# Supplementary material for: Whole Transcriptome Analysis Identifies the Taxonomic Status of a New Chinese Native Cattle Breed and Reveals Genes Related to Body Size
Source: Front Genet. 2020 Nov 3;11:562855. doi: 10.3389/fgene.2020.562855 (PMC7670488; doi:10.3389/fgene.2020.562855)
Supplement: Supplementary file 3 [file Table_3.XLSX]

## Sheet: Sheet1
Supplementary table3: GO annotation of DEGs
ID	Description	GeneRatio	BgRatio	pvalue	p.adjust	qvalue	geneID	Count
GO:0006614	SRP-dependent cotranslational protein targeting to membrane	53/99	91/17381	1.89833e-101	3.65618e-98	2.93541e-98	RPL39/RPS27A/RPS15A/RPL38/RPL11/RPS17/RPL37A/RPL23/RPS29/RPL36/RPS3/RPL3/RPS20/RPS11/RPS21/RPL35/RPL27/RPL36A/RPS12/RPL31/RPS15/RPL7A/RPS10/RPL27A/RPL6/RPL22/RPS14/RPL19/RPL14/RPLP1/RPL10/RPL32/RPS25/RPL21/RPL26/RPL30/RPS9/RPS27/RPL7/RPL28/RPL10A/RPS24/RPS2/RPLP2/RPS8/RPLP0/RPS16/UBA52/RPL12/RPS7/RPL13A/RPL9/RPL17	53
GO:0006613	cotranslational protein targeting to membrane	53/99	96/17381	1.18976e-99	1.14574e-96	9.19874e-97	RPL39/RPS27A/RPS15A/RPL38/RPL11/RPS17/RPL37A/RPL23/RPS29/RPL36/RPS3/RPL3/RPS20/RPS11/RPS21/RPL35/RPL27/RPL36A/RPS12/RPL31/RPS15/RPL7A/RPS10/RPL27A/RPL6/RPL22/RPS14/RPL19/RPL14/RPLP1/RPL10/RPL32/RPS25/RPL21/RPL26/RPL30/RPS9/RPS27/RPL7/RPL28/RPL10A/RPS24/RPS2/RPLP2/RPS8/RPLP0/RPS16/UBA52/RPL12/RPS7/RPL13A/RPL9/RPL17	53
GO:0045047	protein targeting to ER	53/99	100/17381	2.58839e-98	1.66174e-95	1.33415e-95	RPL39/RPS27A/RPS15A/RPL38/RPL11/RPS17/RPL37A/RPL23/RPS29/RPL36/RPS3/RPL3/RPS20/RPS11/RPS21/RPL35/RPL27/RPL36A/RPS12/RPL31/RPS15/RPL7A/RPS10/RPL27A/RPL6/RPL22/RPS14/RPL19/RPL14/RPLP1/RPL10/RPL32/RPS25/RPL21/RPL26/RPL30/RPS9/RPS27/RPL7/RPL28/RPL10A/RPS24/RPS2/RPLP2/RPS8/RPLP0/RPS16/UBA52/RPL12/RPS7/RPL13A/RPL9/RPL17	53
GO:0072599	establishment of protein localization to endoplasmic reticulum	53/99	104/17381	4.71302e-97	2.26932e-94	1.82195e-94	RPL39/RPS27A/RPS15A/RPL38/RPL11/RPS17/RPL37A/RPL23/RPS29/RPL36/RPS3/RPL3/RPS20/RPS11/RPS21/RPL35/RPL27/RPL36A/RPS12/RPL31/RPS15/RPL7A/RPS10/RPL27A/RPL6/RPL22/RPS14/RPL19/RPL14/RPLP1/RPL10/RPL32/RPS25/RPL21/RPL26/RPL30/RPS9/RPS27/RPL7/RPL28/RPL10A/RPS24/RPS2/RPLP2/RPS8/RPLP0/RPS16/UBA52/RPL12/RPS7/RPL13A/RPL9/RPL17	53
GO:0000184	nuclear-transcribed mRNA catabolic process, nonsense-mediated decay	54/99	120/17381	4.13842e-95	1.59412e-92	1.27986e-92	RPL39/RPS27A/RPS15A/RPL38/RPL11/RPS17/RPL37A/RPL23/RPS29/RPL36/RPS3/RPL3/RPS20/RPS11/RPS21/RPL35/RPL27/RPL36A/RPS12/RPL31/RPS15/RPL7A/RPS10/RPL27A/RPL6/RPL22/RPS14/RPL19/RPL14/RPLP1/RPL10/RPL32/RPS25/RPL21/RPL26/RPL30/RPS9/RPS27/RPL7/RPL28/RPL10A/RPS24/RPS2/RPLP2/RPS8/RPLP0/RPS16/UBA52/RPL12/RPS7/RPL13A/RPL9/RPL17/PABPC1	54
GO:0022626	cytosolic ribosome	52/99	113/18511	2.24977e-93	3.75711e-91	2.96022e-91	RPL39/RPS27A/RPS15A/RPL38/RPL11/RPS17/RPL37A/RPL23/RPS29/RPL36/RPS3/RPL3/RPS20/RPS11/RPS21/RPL35/RPL27/RPL36A/RPS12/RPL31/RPS15/RPL7A/RPS10/RPL27A/RPL6/RPL22/RPS14/RPL19/RPL14/RPLP1/RPL10/RPL32/RPS25/RPL21/RPL26/RPL30/RPS9/RPS27/RPL7/RPL28/RPL10A/RPS24/RPS2/RPLP2/RPS8/RPLP0/RPS16/RPL12/RPS7/RPL13A/RPL9/RPL17	52
GO:0070972	protein localization to endoplasmic reticulum	53/99	125/17381	2.06563e-91	6.63069e-89	5.32354e-89	RPL39/RPS27A/RPS15A/RPL38/RPL11/RPS17/RPL37A/RPL23/RPS29/RPL36/RPS3/RPL3/RPS20/RPS11/RPS21/RPL35/RPL27/RPL36A/RPS12/RPL31/RPS15/RPL7A/RPS10/RPL27A/RPL6/RPL22/RPS14/RPL19/RPL14/RPLP1/RPL10/RPL32/RPS25/RPL21/RPL26/RPL30/RPS9/RPS27/RPL7/RPL28/RPL10A/RPS24/RPS2/RPLP2/RPS8/RPLP0/RPS16/UBA52/RPL12/RPS7/RPL13A/RPL9/RPL17	53
GO:0006612	protein targeting to membrane	53/99	163/17381	7.67479e-84	2.11166e-81	1.69538e-81	RPL39/RPS27A/RPS15A/RPL38/RPL11/RPS17/RPL37A/RPL23/RPS29/RPL36/RPS3/RPL3/RPS20/RPS11/RPS21/RPL35/RPL27/RPL36A/RPS12/RPL31/RPS15/RPL7A/RPS10/RPL27A/RPL6/RPL22/RPS14/RPL19/RPL14/RPLP1/RPL10/RPL32/RPS25/RPL21/RPL26/RPL30/RPS9/RPS27/RPL7/RPL28/RPL10A/RPS24/RPS2/RPLP2/RPS8/RPLP0/RPS16/UBA52/RPL12/RPS7/RPL13A/RPL9/RPL17	53
GO:0003735	structural constituent of ribosome	52/99	159/17354	3.1003e-82	6.2626e-80	5.44999e-80	RPL39/RPS27A/RPS15A/RPL38/RPL11/RPS17/RPL37A/RPL23/RPS29/RPL36/RPS3/RPL3/RPS20/RPS11/RPS21/RPL35/RPL27/RPL36A/RPS12/RPL31/RPS15/RPL7A/RPS10/RPL27A/RPL6/RPL22/RPS14/RPL19/RPL14/RPLP1/RPL10/RPL32/RPL21/RPL26/RPL30/RPS9/RPS27/RPL7/RPL28/RPL10A/RPS24/RPS2/RPLP2/RPS8/RPLP0/RPS16/UBA52/RPL12/RPS7/RPL13A/RPL9/RPL17	52
GO:0019083	viral transcription	53/99	177/17381	1.36331e-81	3.07394e-79	2.46795e-79	RPL39/RPS27A/RPS15A/RPL38/RPL11/RPS17/RPL37A/RPL23/RPS29/RPL36/RPS3/RPL3/RPS20/RPS11/RPS21/RPL35/RPL27/RPL36A/RPS12/RPL31/RPS15/RPL7A/RPS10/RPL27A/RPL6/RPL22/RPS14/RPL19/RPL14/RPLP1/RPL10/RPL32/RPS25/RPL21/RPL26/RPL30/RPS9/RPS27/RPL7/RPL28/RPL10A/RPS24/RPS2/RPLP2/RPS8/RPLP0/RPS16/UBA52/RPL12/RPS7/RPL13A/RPL9/RPL17	53
GO:0006413	translational initiation	54/99	192/17381	1.43642e-81	3.07394e-79	2.46795e-79	RPL39/RPS27A/RPS15A/RPL38/RPL11/RPS17/RPL37A/RPL23/RPS29/RPL36/RPS3/RPL3/RPS20/RPS11/RPS21/RPL35/RPL27/RPL36A/RPS12/RPL31/RPS15/RPL7A/RPS10/RPL27A/RPL6/RPL22/RPS14/RPL19/RPL14/RPLP1/RPL10/RPL32/RPS25/RPL21/RPL26/RPL30/RPS9/RPS27/RPL7/RPL28/RPL10A/RPS24/RPS2/RPLP2/RPS8/RPLP0/RPS16/UBA52/RPL12/RPS7/RPL13A/RPL9/RPL17/PABPC1	54
GO:0044391	ribosomal subunit	52/99	185/18511	1.18377e-79	9.88448e-78	7.78796e-78	RPL39/RPS27A/RPS15A/RPL38/RPL11/RPS17/RPL37A/RPL23/RPS29/RPL36/RPS3/RPL3/RPS20/RPS11/RPS21/RPL35/RPL27/RPL36A/RPS12/RPL31/RPS15/RPL7A/RPS10/RPL27A/RPL6/RPL22/RPS14/RPL19/RPL14/RPLP1/RPL10/RPL32/RPS25/RPL21/RPL26/RPL30/RPS9/RPS27/RPL7/RPL28/RPL10A/RPS24/RPS2/RPLP2/RPS8/RPLP0/RPS16/RPL12/RPS7/RPL13A/RPL9/RPL17	52
GO:0019080	viral gene expression	53/99	191/17381	1.51012e-79	2.90848e-77	2.33512e-77	RPL39/RPS27A/RPS15A/RPL38/RPL11/RPS17/RPL37A/RPL23/RPS29/RPL36/RPS3/RPL3/RPS20/RPS11/RPS21/RPL35/RPL27/RPL36A/RPS12/RPL31/RPS15/RPL7A/RPS10/RPL27A/RPL6/RPL22/RPS14/RPL19/RPL14/RPLP1/RPL10/RPL32/RPS25/RPL21/RPL26/RPL30/RPS9/RPS27/RPL7/RPL28/RPL10A/RPS24/RPS2/RPLP2/RPS8/RPLP0/RPS16/UBA52/RPL12/RPS7/RPL13A/RPL9/RPL17	53
GO:0000956	nuclear-transcribed mRNA catabolic process	54/99	209/17381	2.81919e-79	4.93615e-77	3.96306e-77	RPL39/RPS27A/RPS15A/RPL38/RPL11/RPS17/RPL37A/RPL23/RPS29/RPL36/RPS3/RPL3/RPS20/RPS11/RPS21/RPL35/RPL27/RPL36A/RPS12/RPL31/RPS15/RPL7A/RPS10/RPL27A/RPL6/RPL22/RPS14/RPL19/RPL14/RPLP1/RPL10/RPL32/RPS25/RPL21/RPL26/RPL30/RPS9/RPS27/RPL7/RPL28/RPL10A/RPS24/RPS2/RPLP2/RPS8/RPLP0/RPS16/UBA52/RPL12/RPS7/RPL13A/RPL9/RPL17/PABPC1	54
GO:0005840	ribosome	54/99	235/18511	1.25271e-77	6.9734e-76	5.49433e-76	RPL39/RPS27A/RPS15A/RPL38/RPL11/RPS17/RPL37A/RPL23/RPS29/RPL36/RPS3/RPL3/RPS20/RPS11/RPS21/RPL35/RPL27/RPL36A/RPS12/RPL31/RPS15/RPL7A/RPS10/RPL27A/RPL6/RPL22/RPS14/RPL19/RPL14/RPLP1/RPL10/RPL32/RPS25/RPL21/RPL26/RPL30/RPS9/RPS27/RPL7/RPL28/RPL10A/RPS24/RPS2/RPLP2/RPS8/RPLP0/RPS16/UBA52/RPL12/RPS7/RPL13A/RPL9/RPL17/EEF2	54
GO:0044445	cytosolic part	53/99	240/18511	5.12948e-75	2.14156e-73	1.68733e-73	RPL39/RPS27A/RPS15A/RPL38/RPL11/RPS17/RPL37A/RPL23/RPS29/RPL36/RPS3/RPL3/RPS20/RPS11/RPS21/RPL35/RPL27/RPL36A/RPS12/RPL31/RPS15/RPL7A/RPS10/RPL27A/RPL6/RPL22/RPS14/RPL19/RPL14/RPLP1/RPL10/RPL32/RPS25/RPL21/RPL26/RPL30/RPS9/RPS27/RPL7/RPL28/RPL10A/RPS24/RPS2/RPLP2/RPS8/RPLP0/RPS16/RPL12/RPS7/RPL13A/RPL9/RPL17/HBB	53
GO:0006364	rRNA processing	53/99	257/17381	7.89444e-72	1.26706e-69	1.01728e-69	RPL39/RPS27A/RPS15A/RPL38/RPL11/RPS17/RPL37A/RPL23/RPS29/RPL36/RPS3/RPL3/RPS20/RPS11/RPS21/RPL35/RPL27/RPL36A/RPS12/RPL31/RPS15/RPL7A/RPS10/RPL27A/RPL6/RPL22/RPS14/RPL19/RPL14/RPLP1/RPL10/RPL32/RPS25/RPL21/RPL26/RPL30/RPS9/RPS27/RPL7/RPL28/RPL10A/RPS24/RPS2/RPLP2/RPS8/RPLP0/RPS16/UBA52/RPL12/RPS7/RPL13A/RPL9/RPL17	53
GO:0090150	establishment of protein localization to membrane	53/99	275/17381	4.08223e-70	6.04798e-68	4.85571e-68	RPL39/RPS27A/RPS15A/RPL38/RPL11/RPS17/RPL37A/RPL23/RPS29/RPL36/RPS3/RPL3/RPS20/RPS11/RPS21/RPL35/RPL27/RPL36A/RPS12/RPL31/RPS15/RPL7A/RPS10/RPL27A/RPL6/RPL22/RPS14/RPL19/RPL14/RPLP1/RPL10/RPL32/RPS25/RPL21/RPL26/RPL30/RPS9/RPS27/RPL7/RPL28/RPL10A/RPS24/RPS2/RPLP2/RPS8/RPLP0/RPS16/UBA52/RPL12/RPS7/RPL13A/RPL9/RPL17	53
GO:0016072	rRNA metabolic process	53/99	292/17381	1.30905e-68	1.80088e-66	1.44586e-66	RPL39/RPS27A/RPS15A/RPL38/RPL11/RPS17/RPL37A/RPL23/RPS29/RPL36/RPS3/RPL3/RPS20/RPS11/RPS21/RPL35/RPL27/RPL36A/RPS12/RPL31/RPS15/RPL7A/RPS10/RPL27A/RPL6/RPL22/RPS14/RPL19/RPL14/RPLP1/RPL10/RPL32/RPS25/RPL21/RPL26/RPL30/RPS9/RPS27/RPL7/RPL28/RPL10A/RPS24/RPS2/RPLP2/RPS8/RPLP0/RPS16/UBA52/RPL12/RPS7/RPL13A/RPL9/RPL17	53
GO:0006402	mRNA catabolic process	54/99	342/17381	1.57032e-66	2.01629e-64	1.61881e-64	RPL39/RPS27A/RPS15A/RPL38/RPL11/RPS17/RPL37A/RPL23/RPS29/RPL36/RPS3/RPL3/RPS20/RPS11/RPS21/RPL35/RPL27/RPL36A/RPS12/RPL31/RPS15/RPL7A/RPS10/RPL27A/RPL6/RPL22/RPS14/RPL19/RPL14/RPLP1/RPL10/RPL32/RPS25/RPL21/RPL26/RPL30/RPS9/RPS27/RPL7/RPL28/RPL10A/RPS24/RPS2/RPLP2/RPS8/RPLP0/RPS16/UBA52/RPL12/RPS7/RPL13A/RPL9/RPL17/PABPC1	54
GO:0006401	RNA catabolic process	55/99	376/17381	5.67673e-66	6.83337e-64	5.48627e-64	RPL39/RPS27A/RPS15A/RPL38/RPL11/RPS17/RPL37A/RPL23/RPS29/RPL36/RPS3/RPL3/RPS20/RPS11/RPS21/RPL35/RPL27/RPL36A/RPS12/RPL31/RPS15/RPL7A/RPS10/RPL27A/RPL6/RPL22/RPS14/RPL19/RPL14/RPLP1/RPL10/RPL32/RPS25/RNASE6/RPL21/RPL26/RPL30/RPS9/RPS27/RPL7/RPL28/RPL10A/RPS24/RPS2/RPLP2/RPS8/RPLP0/RPS16/UBA52/RPL12/RPS7/RPL13A/RPL9/RPL17/PABPC1	55
GO:0042254	ribosome biogenesis	53/99	326/17381	7.15743e-66	8.10895e-64	6.51038e-64	RPL39/RPS27A/RPS15A/RPL38/RPL11/RPS17/RPL37A/RPL23/RPS29/RPL36/RPS3/RPL3/RPS20/RPS11/RPS21/RPL35/RPL27/RPL36A/RPS12/RPL31/RPS15/RPL7A/RPS10/RPL27A/RPL6/RPL22/RPS14/RPL19/RPL14/RPLP1/RPL10/RPL32/RPS25/RPL21/RPL26/RPL30/RPS9/RPS27/RPL7/RPL28/RPL10A/RPS24/RPS2/RPLP2/RPS8/RPLP0/RPS16/UBA52/RPL12/RPS7/RPL13A/RPL9/RPL17	53
GO:0006605	protein targeting	53/99	396/17381	4.08899e-61	4.37522e-59	3.51271e-59	RPL39/RPS27A/RPS15A/RPL38/RPL11/RPS17/RPL37A/RPL23/RPS29/RPL36/RPS3/RPL3/RPS20/RPS11/RPS21/RPL35/RPL27/RPL36A/RPS12/RPL31/RPS15/RPL7A/RPS10/RPL27A/RPL6/RPL22/RPS14/RPL19/RPL14/RPLP1/RPL10/RPL32/RPS25/RPL21/RPL26/RPL30/RPS9/RPS27/RPL7/RPL28/RPL10A/RPS24/RPS2/RPLP2/RPS8/RPLP0/RPS16/UBA52/RPL12/RPS7/RPL13A/RPL9/RPL17	53
GO:0034470	ncRNA processing	53/99	400/17381	7.16009e-61	7.25807e-59	5.82724e-59	RPL39/RPS27A/RPS15A/RPL38/RPL11/RPS17/RPL37A/RPL23/RPS29/RPL36/RPS3/RPL3/RPS20/RPS11/RPS21/RPL35/RPL27/RPL36A/RPS12/RPL31/RPS15/RPL7A/RPS10/RPL27A/RPL6/RPL22/RPS14/RPL19/RPL14/RPLP1/RPL10/RPL32/RPS25/RPL21/RPL26/RPL30/RPS9/RPS27/RPL7/RPL28/RPL10A/RPS24/RPS2/RPLP2/RPS8/RPLP0/RPS16/UBA52/RPL12/RPS7/RPL13A/RPL9/RPL17	53
GO:0022625	cytosolic large ribosomal subunit	32/99	61/18511	1.43333e-58	4.78733e-57	3.77192e-57	RPL39/RPL38/RPL11/RPL37A/RPL23/RPL36/RPL3/RPL35/RPL27/RPL36A/RPL31/RPL7A/RPL27A/RPL6/RPL22/RPL19/RPL14/RPLP1/RPL10/RPL32/RPL21/RPL26/RPL30/RPL7/RPL28/RPL10A/RPLP2/RPLP0/RPL12/RPL13A/RPL9/RPL17	32
GO:0022613	ribonucleoprotein complex biogenesis	53/99	464/17381	2.64242e-57	2.54465e-55	2.04301e-55	RPL39/RPS27A/RPS15A/RPL38/RPL11/RPS17/RPL37A/RPL23/RPS29/RPL36/RPS3/RPL3/RPS20/RPS11/RPS21/RPL35/RPL27/RPL36A/RPS12/RPL31/RPS15/RPL7A/RPS10/RPL27A/RPL6/RPL22/RPS14/RPL19/RPL14/RPLP1/RPL10/RPL32/RPS25/RPL21/RPL26/RPL30/RPS9/RPS27/RPL7/RPL28/RPL10A/RPS24/RPS2/RPLP2/RPS8/RPLP0/RPS16/UBA52/RPL12/RPS7/RPL13A/RPL9/RPL17	53
GO:0015934	large ribosomal subunit	32/99	115/18511	1.52964e-47	4.25751e-46	3.35448e-46	RPL39/RPL38/RPL11/RPL37A/RPL23/RPL36/RPL3/RPL35/RPL27/RPL36A/RPL31/RPL7A/RPL27A/RPL6/RPL22/RPL19/RPL14/RPLP1/RPL10/RPL32/RPL21/RPL26/RPL30/RPL7/RPL28/RPL10A/RPLP2/RPLP0/RPL12/RPL13A/RPL9/RPL17	32
GO:0005925	focal adhesion	39/99	394/18511	1.63669e-39	3.90468e-38	3.07649e-38	RPL38/RPS17/ANXA1/RPL37A/RPL23/RPS29/RPS3/RPL3/RPS11/RPL27/RPL31/RPS15/RPL7A/RPS10/RPL6/RPL22/RPS14/RPL19/RPLP1/RPL30/RPS9/RPL7/RPL10A/RPS2/RPLP2/PPIA/RPS8/RPLP0/RPS16/RPL12/RPS7/RPL13A/RPL9/TLN1/PABPC1/AHNAK/PTPRC/ADGRE5/ZYX	39
GO:0005924	cell-substrate adherens junction	39/99	397/18511	2.21228e-39	4.61813e-38	3.63862e-38	RPL38/RPS17/ANXA1/RPL37A/RPL23/RPS29/RPS3/RPL3/RPS11/RPL27/RPL31/RPS15/RPL7A/RPS10/RPL6/RPL22/RPS14/RPL19/RPLP1/RPL30/RPS9/RPL7/RPL10A/RPS2/RPLP2/PPIA/RPS8/RPLP0/RPS16/RPL12/RPS7/RPL13A/RPL9/TLN1/PABPC1/AHNAK/PTPRC/ADGRE5/ZYX	39
GO:0030055	cell-substrate junction	39/99	402/18511	3.63572e-39	6.74628e-38	5.31538e-38	RPL38/RPS17/ANXA1/RPL37A/RPL23/RPS29/RPS3/RPL3/RPS11/RPL27/RPL31/RPS15/RPL7A/RPS10/RPL6/RPL22/RPS14/RPL19/RPLP1/RPL30/RPS9/RPL7/RPL10A/RPS2/RPLP2/PPIA/RPS8/RPLP0/RPS16/RPL12/RPS7/RPL13A/RPL9/TLN1/PABPC1/AHNAK/PTPRC/ADGRE5/ZYX	39
GO:0022627	cytosolic small ribosomal subunit	20/99	45/18511	1.35201e-34	2.25785e-33	1.77896e-33	RPS27A/RPS15A/RPS17/RPS29/RPS3/RPS20/RPS11/RPS21/RPS12/RPS15/RPS10/RPS14/RPS25/RPS9/RPS27/RPS24/RPS2/RPS8/RPS16/RPS7	20
GO:0015935	small ribosomal subunit	20/99	72/18511	1.19199e-29	1.80966e-28	1.42583e-28	RPS27A/RPS15A/RPS17/RPS29/RPS3/RPS20/RPS11/RPS21/RPS12/RPS15/RPS10/RPS14/RPS25/RPS9/RPS27/RPS24/RPS2/RPS8/RPS16/RPS7	20
GO:0002181	cytoplasmic translation	17/99	63/17381	1.35308e-24	1.24096e-22	9.96325e-23	RPL36/RPS3/RPS20/RPL36A/RPL31/RPL27A/RPL6/RPL22/RPLP1/RPL26/RPL30/RPL7/RPLP2/RPS7/RPL13A/RPL9/EEF2	17
GO:0042273	ribosomal large subunit biogenesis	12/99	68/17381	3.28397e-15	2.87497e-13	2.30821e-13	RPL38/RPL11/RPL3/RPL35/RPL7A/RPL6/RPL14/RPL10/RPL26/RPL7/RPL10A/RPL12	12
GO:0042255	ribosome assembly	11/99	62/17381	4.6259e-14	3.87369e-12	3.11004e-12	RPL38/RPL11/RPS17/RPL3/RPS15/RPS10/RPL6/RPS14/RPL10/RPS27/RPL12	11
GO:0042274	ribosomal small subunit biogenesis	11/99	71/17381	2.2347e-13	1.79335e-11	1.43981e-11	RPL38/RPS17/RPS21/RPS15/RPS10/RPS14/RPS27/RPS24/RPS8/RPS16/RPS7	11
GO:0019843	rRNA binding	10/99	59/17354	1.14304e-12	1.15447e-10	1.00467e-10	RPL11/RPL23/RPS3/RPL3/RPS11/RPS14/RPS9/RPL12/RPL9/EEF2	10
GO:0000028	ribosomal small subunit assembly	6/99	19/17381	7.4853e-10	5.76667e-08	4.62985e-08	RPL38/RPS17/RPS15/RPS10/RPS14/RPS27	6
GO:0022618	ribonucleoprotein complex assembly	12/99	209/17381	2.46133e-09	1.82328e-07	1.46384e-07	RPL38/RPL11/RPS17/RPL3/RPS15/RPS10/RPL6/RPS14/RPL10/RPS27/RPL12/RPL13A	12
GO:0060205	cytoplasmic vesicle lumen	14/99	338/18511	3.28438e-09	4.38186e-08	3.45246e-08	GMFG/TMSB4X/S100A11/S100A8/S100A12/S100A9/PPIA/TCN1/SRGN/TGFB1/EEF2/COTL1/PF4/HBB	14
GO:0031983	vesicle lumen	14/99	339/18511	3.41103e-09	4.38186e-08	3.45246e-08	GMFG/TMSB4X/S100A11/S100A8/S100A12/S100A9/PPIA/TCN1/SRGN/TGFB1/EEF2/COTL1/PF4/HBB	14
GO:0071826	ribonucleoprotein complex subunit organization	12/99	221/17381	4.62995e-09	3.3027e-07	2.65162e-07	RPL38/RPL11/RPS17/RPL3/RPS15/RPS10/RPL6/RPS14/RPL10/RPS27/RPL12/RPL13A	12
GO:0000027	ribosomal large subunit assembly	6/99	29/17381	1.25166e-08	8.6096e-07	6.91234e-07	RPL38/RPL11/RPL3/RPL6/RPL10/RPL12	6
GO:0034774	secretory granule lumen	13/99	321/18511	1.63381e-08	1.9489e-07	1.53553e-07	GMFG/TMSB4X/S100A11/S100A8/S100A12/S100A9/PPIA/TCN1/SRGN/TGFB1/EEF2/COTL1/PF4	13
GO:0019730	antimicrobial humoral response	8/99	105/17381	1.47208e-07	9.77662e-06	7.8493e-06	RPL39/RNASE6/RPL30/JCHAIN/S100A8/S100A12/S100A9/PF4	8
GO:0061844	antimicrobial humoral immune response mediated by antimicrobial peptide	6/99	54/17381	6.06745e-07	3.85328e-05	3.09366e-05	RPL39/RNASE6/RPL30/S100A12/S100A9/PF4	6
GO:0043312	neutrophil degranulation	14/99	485/17381	6.24664e-07	3.85328e-05	3.09366e-05	GMFG/S100A11/S100A8/S100A12/S100A9/PPIA/TCN1/ITGB2/EEF2/COTL1/PTPRC/PSAP/ADGRE5/HBB	14
GO:0002283	neutrophil activation involved in immune response	14/99	486/17381	6.40212e-07	3.85328e-05	3.09366e-05	GMFG/S100A11/S100A8/S100A12/S100A9/PPIA/TCN1/ITGB2/EEF2/COTL1/PTPRC/PSAP/ADGRE5/HBB	14
GO:0042119	neutrophil activation	14/99	496/17381	8.15938e-07	4.67004e-05	3.7494e-05	GMFG/S100A11/S100A8/S100A12/S100A9/PPIA/TCN1/ITGB2/EEF2/COTL1/PTPRC/PSAP/ADGRE5/HBB	14
GO:2001244	positive regulation of intrinsic apoptotic signaling pathway	6/99	57/17381	8.4085e-07	4.67004e-05	3.7494e-05	RPL11/RPS3/RPL26/S100A8/S100A9/RPS7	6
GO:0048872	homeostasis of number of cells	10/99	233/17381	8.48657e-07	4.67004e-05	3.7494e-05	RPS17/ANXA1/RPS14/ISG15/RPS24/TGFB1/KLF2/ETS1/MPIG6B/CD74	10
GO:0002446	neutrophil mediated immunity	14/99	499/17381	8.76509e-07	4.68933e-05	3.76489e-05	GMFG/S100A11/S100A8/S100A12/S100A9/PPIA/TCN1/ITGB2/EEF2/COTL1/PTPRC/PSAP/ADGRE5/HBB	14
GO:0002262	myeloid cell homeostasis	8/99	133/17381	9.07849e-07	4.72572e-05	3.79411e-05	RPS17/ANXA1/RPS14/ISG15/RPS24/KLF2/ETS1/MPIG6B	8
GO:0051092	positive regulation of NF-kappaB transcription factor activity	8/99	140/17381	1.33907e-06	6.78695e-05	5.449e-05	RPS27A/RPS3/S100A8/S100A12/S100A9/UBA52/TGFB1/ITGB2	8
GO:0000462	maturation of SSU-rRNA from tricistronic rRNA transcript (SSU-rRNA, 5.8S rRNA, LSU-rRNA)	5/99	36/17381	1.77452e-06	8.76338e-05	7.0358e-05	RPS21/RPS14/RPS24/RPS8/RPS16	5
GO:0050832	defense response to fungus	5/99	40/17381	3.04194e-06	0.000141872	0.000113904	S100A8/S100A12/S100A9/TGFB1/COTL1	5
GO:0034101	erythrocyte homeostasis	7/99	110/17381	3.09379e-06	0.000141872	0.000113904	RPS17/RPS14/ISG15/RPS24/KLF2/ETS1/MPIG6B	7
GO:0071621	granulocyte chemotaxis	7/99	110/17381	3.09379e-06	0.000141872	0.000113904	ANXA1/S100A8/S100A12/S100A9/ITGB2/CD74/PF4	7
GO:2001242	regulation of intrinsic apoptotic signaling pathway	8/99	159/17381	3.47733e-06	0.000155752	0.000125048	RPL11/RPS3/RPL26/S100A8/S100A9/RPS7/TPT1/CD74	8
GO:1901798	positive regulation of signal transduction by p53 class mediator	4/99	21/17381	5.50166e-06	0.000240823	0.000193348	RPL11/RPL23/RPL26/RPS7	4
GO:0097530	granulocyte migration	7/99	124/17381	6.85906e-06	0.000293568	0.000235695	ANXA1/S100A8/S100A12/S100A9/ITGB2/CD74/PF4	7
GO:0000470	maturation of LSU-rRNA	4/99	23/17381	8.069e-06	0.000337846	0.000271244	RPL35/RPL7A/RPL7/RPL10A	4
GO:0030490	maturation of SSU-rRNA	5/99	52/17381	1.13829e-05	0.000458185	0.00036786	RPS21/RPS14/RPS24/RPS8/RPS16	5
GO:0042542	response to hydrogen peroxide	7/99	134/17381	1.14189e-05	0.000458185	0.00036786	ANXA1/RPS3/KLF2/EEF2/ETS1/PSAP/HBB	7
GO:0030593	neutrophil chemotaxis	6/99	90/17381	1.24018e-05	0.000487468	0.000391371	S100A8/S100A12/S100A9/ITGB2/CD74/PF4	6
GO:0009620	response to fungus	5/99	54/17381	1.3727e-05	0.000528763	0.000424524	S100A8/S100A12/S100A9/TGFB1/COTL1	5
GO:0031397	negative regulation of protein ubiquitination	7/99	139/17381	1.45036e-05	0.000547724	0.000439748	RPS27A/RPL11/RPL23/RPS3/ISG15/UBA52/RPS7	7
GO:1902253	regulation of intrinsic apoptotic signaling pathway by p53 class mediator	4/99	27/17381	1.5715e-05	0.000582061	0.000467316	RPL11/RPL26/RPS7/CD74	4
GO:1903321	negative regulation of protein modification by small protein conjugation or removal	7/99	150/17381	2.37614e-05	0.000856157	0.000687377	RPS27A/RPL11/RPL23/RPS3/ISG15/UBA52/RPS7	7
GO:1990266	neutrophil migration	6/99	101/17381	2.40044e-05	0.000856157	0.000687377	S100A8/S100A12/S100A9/ITGB2/CD74/PF4	6
GO:0008097	5S rRNA binding	3/99	11/17354	2.87447e-05	0.00145161	0.00126325	RPL11/RPL3/EEF2	3
GO:0050786	RAGE receptor binding	3/99	11/17354	2.87447e-05	0.00145161	0.00126325	S100A8/S100A12/S100A9	3
GO:0042742	defense response to bacterium	9/99	290/17381	4.12334e-05	0.00144392	0.00115927	RPL39/RNASE6/RPL30/JCHAIN/ISG15/S100A8/S100A12/S100A9/IGLL1	9
GO:0097193	intrinsic apoptotic signaling pathway	9/99	292/17381	4.34943e-05	0.00149589	0.001201	RPL11/RPS3/RPL26/S100A8/S100A9/RPS7/CRIP1/TPT1/CD74	9
GO:2000059	negative regulation of protein ubiquitination involved in ubiquitin-dependent protein catabolic process	3/99	13/17381	4.91856e-05	0.00166195	0.00133432	RPL11/RPL23/RPS7	3
GO:1903708	positive regulation of hemopoiesis	7/99	169/17381	5.09699e-05	0.00169255	0.00135889	ANXA1/ISG15/TGFB1/ETS1/GNAS/CD74/PF4	7
GO:1902229	regulation of intrinsic apoptotic signaling pathway in response to DNA damage	4/99	37/17381	5.66128e-05	0.00184807	0.00148375	RPS3/RPL26/TPT1/CD74	4
GO:0045296	cadherin binding	9/99	304/17354	6.009e-05	0.00242764	0.00211264	ANXA1/RPL7A/RPL6/RPL14/S100A11/RPS2/TLN1/EEF2/AHNAK	9
GO:0002523	leukocyte migration involved in inflammatory response	3/99	14/17381	6.23411e-05	0.00200115	0.00160665	S100A8/S100A9/ITGB2	3
GO:2001233	regulation of apoptotic signaling pathway	10/99	383/17381	6.5441e-05	0.00204697	0.00164344	RPL11/RPS3/RPL26/IFI6/S100A8/S100A9/RPS7/TPT1/CD74/PF4	10
GO:1901796	regulation of signal transduction by p53 class mediator	7/99	176/17381	6.58942e-05	0.00204697	0.00164344	RPS27A/RPL11/RPL23/RPL26/UBA52/RPS7/CD74	7
GO:0097529	myeloid leukocyte migration	7/99	179/17381	7.32992e-05	0.00223083	0.00179106	ANXA1/S100A8/S100A12/S100A9/ITGB2/CD74/PF4	7
GO:0050900	leukocyte migration	11/99	471/17381	7.58255e-05	0.00223083	0.00179106	ANXA1/JCHAIN/S100A8/S100A12/S100A9/PPIA/IGLL1/TGFB1/ITGB2/CD74/PF4	11
GO:0030099	myeloid cell differentiation	10/99	390/17381	7.60692e-05	0.00223083	0.00179106	RPS14/ISG15/TGFB1/KLF2/ETS1/GNAS/MYL9/MPIG6B/CD74/PF4	10
GO:1904667	negative regulation of ubiquitin protein ligase activity	5/99	77/17381	7.73354e-05	0.00223083	0.00179106	RPS27A/RPL11/RPL23/UBA52/RPS7	5
GO:0034616	response to laminar fluid shear stress	3/99	15/17381	7.76043e-05	0.00223083	0.00179106	TGFB1/KLF2/ETS1	3
GO:0001818	negative regulation of cytokine production	8/99	245/17381	7.89e-05	0.00223473	0.00179418	RPS27A/ANXA1/TMSB4X/ISG15/UBA52/SRGN/TGFB1/KLF2	8
GO:0051091	positive regulation of DNA binding transcription factor activity	8/99	246/17381	8.11736e-05	0.0022658	0.00181913	RPS27A/RPS3/S100A8/S100A12/S100A9/UBA52/TGFB1/ITGB2	8
GO:0006959	humoral immune response	9/99	321/17381	9.00805e-05	0.00246299	0.00197745	RPL39/RNASE6/RPL30/JCHAIN/S100A8/S100A12/S100A9/IGLL1/PF4	9
GO:0002576	platelet degranulation	6/99	128/17381	9.07957e-05	0.00246299	0.00197745	TMSB4X/SRGN/TGFB1/TLN1/PSAP/PF4	6
GO:1903900	regulation of viral life cycle	6/99	133/17381	0.000112193	0.00300115	0.00240951	IFITM1/MX1/ISG15/PPIA/PABPC1/CD74	6
GO:0055106	ubiquitin-protein transferase regulator activity	3/99	17/17354	0.000115551	0.00389022	0.00338544	RPL11/RPL23/RPS7	3
GO:0051444	negative regulation of ubiquitin-protein transferase activity	5/99	84/17381	0.0001171	0.00308952	0.00248046	RPS27A/RPL11/RPL23/UBA52/RPS7	5
GO:0045069	regulation of viral genome replication	5/99	85/17381	0.000123862	0.00322375	0.00258823	IFITM1/MX1/ISG15/PPIA/PABPC1	5
GO:0045639	positive regulation of myeloid cell differentiation	5/99	86/17381	0.000130919	0.00336199	0.00269922	ISG15/ETS1/GNAS/CD74/PF4	5
GO:0060337	type I interferon signaling pathway	5/99	88/17381	0.000145954	0.00360393	0.00289347	IFITM1/IFIT2/MX1/ISG15/IFI6	5
GO:0071158	positive regulation of cell cycle arrest	5/99	88/17381	0.000145954	0.00360393	0.00289347	RPS27A/RPL23/RPL26/UBA52/TGFB1	5
GO:0071357	cellular response to type I interferon	5/99	88/17381	0.000145954	0.00360393	0.00289347	IFITM1/IFIT2/MX1/ISG15/IFI6	5
GO:0005844	polysome	4/99	50/18511	0.000146775	0.00163409	0.0012875	RPS3/RPL7A/RPL7/EEF2	4
GO:0060326	cell chemotaxis	8/99	270/17381	0.000154474	0.00376603	0.00302361	ANXA1/TMSB4X/S100A8/S100A12/S100A9/ITGB2/CD74/PF4	8
GO:0045182	translation regulator activity	4/99	48/17354	0.000159925	0.00423305	0.00368379	RPS14/RPL10/RPS9/PABPC1	4
GO:0030595	leukocyte chemotaxis	7/99	203/17381	0.000160556	0.00386538	0.00310338	ANXA1/S100A8/S100A12/S100A9/ITGB2/CD74/PF4	7
GO:0003729	mRNA binding	9/99	348/17354	0.000167645	0.00423305	0.00368379	RPS3/RPL35/RPS14/RPL26/RPL7/RPS2/RPS7/RPL13A/PABPC1	9
GO:0070301	cellular response to hydrogen peroxide	5/99	91/17381	0.000170942	0.00406461	0.00326333	ANXA1/RPS3/KLF2/ETS1/PSAP	5
GO:1904666	regulation of ubiquitin protein ligase activity	5/99	92/17381	0.000179957	0.00422679	0.00339354	RPS27A/RPL11/RPL23/UBA52/RPS7	5
GO:0034340	response to type I interferon	5/99	93/17381	0.000189331	0.00439339	0.00352729	IFITM1/IFIT2/MX1/ISG15/IFI6	5
GO:0032103	positive regulation of response to external stimulus	8/99	281/17381	0.000202854	0.00465115	0.00373424	TMSB4X/S100A8/S100A12/S100A9/TGFB1/ETS1/CD74/PF4	8
GO:1903706	regulation of hemopoiesis	10/99	448/17381	0.000235521	0.00533663	0.00428459	RPS27A/ANXA1/ISG15/UBA52/TGFB1/ETS1/GNAS/MYL9/CD74/PF4	10
GO:0000302	response to reactive oxygen species	7/99	219/17381	0.000255592	0.00572406	0.00459564	ANXA1/RPS3/KLF2/EEF2/ETS1/PSAP/HBB	7
GO:0048027	mRNA 5'-UTR binding	3/99	22/17354	0.000256324	0.00575306	0.00500657	RPS14/RPL26/RPS7	3
GO:0001503	ossification	9/99	373/17381	0.000277285	0.00610111	0.00489836	RPL38/TMSB4X/RPS11/IFITM1/RPS15/ISG15/SRGN/TGFB1/GNAS	9
GO:0007159	leukocyte cell-cell adhesion	9/99	374/17381	0.000282799	0.00610111	0.00489836	ANXA1/RPS3/S100A8/S100A9/TGFB1/ITGB2/ETS1/PTPRC/CD74	9
GO:0030168	platelet activation	6/99	158/17381	0.000286545	0.00610111	0.00489836	TLN1/GNAS/MYL9/MPIG6B/PF4/HBB	6
GO:0070527	platelet aggregation	4/99	56/17381	0.00028982	0.00610111	0.00489836	TLN1/GNAS/MYL9/HBB	4
GO:0008630	intrinsic apoptotic signaling pathway in response to DNA damage	5/99	102/17381	0.000291434	0.00610111	0.00489836	RPS3/RPL26/CRIP1/TPT1/CD74	5
GO:0030218	erythrocyte differentiation	5/99	102/17381	0.000291434	0.00610111	0.00489836	RPS14/ISG15/KLF2/ETS1/MPIG6B	5
GO:0050839	cell adhesion molecule binding	10/99	463/17354	0.000309971	0.00626142	0.00544897	ANXA1/RPL7A/RPL6/RPL14/S100A11/RPS2/ITGB2/TLN1/EEF2/AHNAK	10
GO:2000058	regulation of protein ubiquitination involved in ubiquitin-dependent protein catabolic process	5/99	106/17381	0.000348291	0.007213	0.00579105	RPS27A/RPL11/RPL23/UBA52/RPS7	5
GO:0051090	regulation of DNA binding transcription factor activity	9/99	391/17381	0.000391394	0.00796088	0.00639151	RPS27A/TMSB4X/RPS3/S100A8/S100A12/S100A9/UBA52/TGFB1/ITGB2	9
GO:0009615	response to virus	8/99	310/17381	0.000392671	0.00796088	0.00639151	RPS15A/IFITM1/IFIT2/MX1/RNASE6/ISG15/TPT1/PTPRC	8
GO:0019058	viral life cycle	8/99	313/17381	0.000418621	0.00839858	0.00674292	RPS27A/IFITM1/MX1/ISG15/PPIA/UBA52/PABPC1/CD74	8
GO:0031093	platelet alpha granule lumen	4/99	67/18511	0.000455716	0.00468573	0.00369188	TMSB4X/SRGN/TGFB1/PF4	4
GO:0019079	viral genome replication	5/99	113/17381	0.000467525	0.00909549	0.00730244	IFITM1/MX1/ISG15/PPIA/PABPC1	5
GO:0045727	positive regulation of translation	5/99	113/17381	0.000467525	0.00909549	0.00730244	RPL26/RPS9/TGFB1/EEF2/PABPC1	5
GO:0071156	regulation of cell cycle arrest	5/99	113/17381	0.000467525	0.00909549	0.00730244	RPS27A/RPL23/RPL26/UBA52/TGFB1	5
GO:0101002	ficolin-1-rich granule	6/99	185/18511	0.000476991	0.00468573	0.00369188	GMFG/PPIA/ITGB2/EEF2/COTL1/HBB	6
GO:1904813	ficolin-1-rich granule lumen	5/99	124/18511	0.000538274	0.00499398	0.00393475	GMFG/PPIA/EEF2/COTL1/HBB	5
GO:0031091	platelet alpha granule	4/99	90/18511	0.00138331	0.0121586	0.00957974	TMSB4X/SRGN/TGFB1/PF4	4
GO:0018995	host	3/99	68/18511	0.0057829	0.0459878	0.0362337	RPS27A/UBA52/PF4	3
GO:0043657	host cell	3/99	68/18511	0.0057829	0.0459878	0.0362337	RPS27A/UBA52/PF4	3
GO:0042629	mast cell granule	2/99	22/18511	0.00610032	0.046307	0.0364852	ANXA1/SRGN	2
GO:0044215	other organism	3/99	74/18511	0.00730977	0.0488293	0.0384725	RPS27A/UBA52/PF4	3
GO:0044216	other organism cell	3/99	74/18511	0.00730977	0.0488293	0.0384725	RPS27A/UBA52/PF4	3
GO:0044217	other organism part	3/99	74/18511	0.00730977	0.0488293	0.0384725	RPS27A/UBA52/PF4	3
GO:0044322	endoplasmic reticulum quality control compartment	2/99	26/18511	0.00846441	0.0543676	0.0428361	RPS27A/UBA52	2
GO:0071556	integral component of lumenal side of endoplasmic reticulum membrane	2/99	29/18511	0.0104647	0.0624143	0.0491761	TAPBP/CD74	2
GO:0098553	lumenal side of endoplasmic reticulum membrane	2/99	29/18511	0.0104647	0.0624143	0.0491761	TAPBP/CD74	2
GO:0005913	cell-cell adherens junction	3/99	88/18511	0.0117284	0.0675392	0.053214	ANXA1/S100A11/ZYX	3
GO:0030666	endocytic vesicle membrane	4/99	169/18511	0.0128999	0.0718094	0.0565785	RPS27A/UBA52/TAPBP/CD74	4
GO:0098552	side of membrane	7/99	482/18511	0.0148343	0.0781959	0.0616104	ANXA1/IGLL1/TAPBP/ITGB2/PTPRC/GNAS/CD74	7
GO:0009897	external side of plasma membrane	5/99	270/18511	0.0149836	0.0781959	0.0616104	ANXA1/IGLL1/ITGB2/PTPRC/CD74	5
GO:0072562	blood microparticle	4/99	181/18511	0.0162132	0.0813346	0.0640833	JCHAIN/IGLL1/TGFB1/HBB	4
GO:0030139	endocytic vesicle	5/99	277/18511	0.0165591	0.0813346	0.0640833	RPS27A/UBA52/TAPBP/CD74/HBB	5
GO:0036464	cytoplasmic ribonucleoprotein granule	4/99	185/18511	0.0174258	0.0814817	0.0641993	RPL6/RPL28/RPLP0/PABPC1	4
GO:0005771	multivesicular body	2/99	38/18511	0.0175649	0.0814817	0.0641993	TPT1/CD74	2
GO:0035770	ribonucleoprotein granule	4/99	196/18511	0.0210477	0.0949989	0.0748494	RPL6/RPL28/RPLP0/PABPC1	4
GO:0042571	immunoglobulin complex, circulating	2/99	46/18511	0.0251574	0.11056	0.0871102	JCHAIN/IGLL1	2
GO:0019814	immunoglobulin complex	2/99	49/18511	0.0282916	0.121146	0.0954506	JCHAIN/IGLL1	2
GO:1904724	tertiary granule lumen	2/99	55/18511	0.0349978	0.146116	0.115124	TCN1/HBB	2
GO:0005765	lysosomal membrane	5/99	349/18511	0.0393871	0.15661	0.123393	UBA52/AHNAK/PSAP/CD74/LAPTM5	5
GO:0098852	lytic vacuole membrane	5/99	349/18511	0.0393871	0.15661	0.123393	UBA52/AHNAK/PSAP/CD74/LAPTM5	5
